# Supplementary material
Source: Springer Nature journal article supplement (https://www.springermedizin.de/resource/supplementary/12913_2011_2323_MOESM2_ESM.pdf/9529962)

**ADDITIONAL FILE 2**

**Evaluating acute stroke services: risk adjusted cost-effectiveness (RAC-E) analysis using routinely collected data.**

**C Pham, O Caffrey, J Karnon, D Ben-Tovim, P Hakendorf, M Crotty.**

Figure 1. Mean survival curves versus Kaplan-Meier survival curves for intermediate endpoints

Figure 1. Mean survival curves versus Kaplan-Meier survival curves for intermediate endpoints

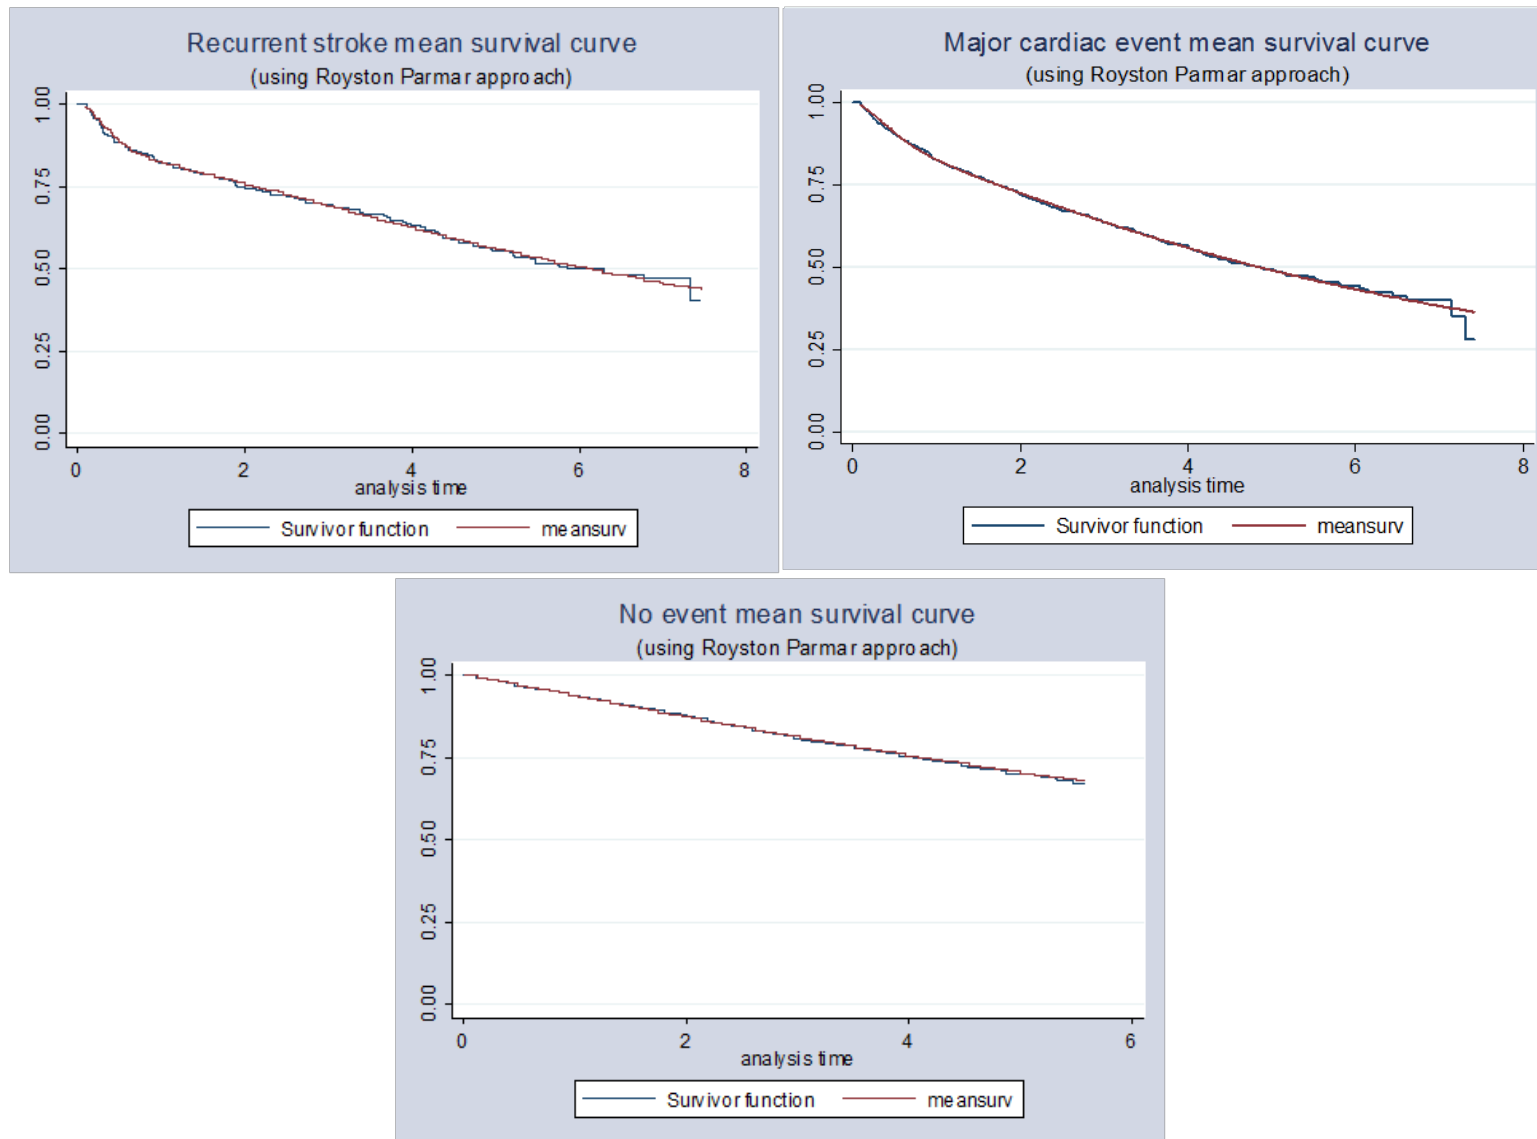

Supplement: MOESM2 [file 9529962]
